# Supplementary material
Source: MDPI journal article supplement (https://www.mdpi.com/2073-4395/10/1/134)
Supplement: s1 [file s1]

Table S1. Results of linear regressions of traits over time (in days), showing the coefficients of determination of the regression lines of the traits (column  $R^2_{\text{time}}$ ) and of the differences in regression parameters among the genotypes (column  $R^2_{\text{time+genotype}}$ ). Genotypic slopes in relation to the slope of genotype SBCC146, and significance of the differences to SBCC146 are shown.

| Trait                   | $R^2_{\text{time}}$ | $R^2_{\text{time+genotype}}$ | Cierzo   | Orria     | Scarlett  | SBCC042   | SBCC073   | SBCC146 |
|-------------------------|---------------------|------------------------------|----------|-----------|-----------|-----------|-----------|---------|
| ----- Control -----     |                     |                              |          |           |           |           |           |         |
| Leaf area               | 65.7                | 15.2 **                      | -0.842   | -1.356 ** | -1.800 ** | -0.845 ** | -1.080 ** | 0       |
| Leaf number             | 72.1                | 3.2 **                       | -0.056   | -0.095 ** | -0.059 *  | -0.058 *  | -0.024    | 0       |
| Length of primary root  | 62.7                | 9.2 **                       | -0.108   | -1.167    | -3.667 ** | -2.413 ** | 0.268     | 0       |
| Length of lateral roots | 43.6                | 8.3 **                       | 0.886    | -1.924 ** | -0.986 *  | -1.281 ** | 0.540     | 0       |
| Root system depth       | 67.7                | 2.8 **                       | -0.187   | -0.487 ** | -0.289    | -0.454 ** | -0.344 ** | 0       |
| Root system width       | 37.3                | 1.1                          | 0.151    | -0.059    | 0.064     | -0.057    | 0.030     | 0       |
| Total root length       | 66.0                | 8.6 **                       | 0.780    | -3.090 ** | -4.658 ** | -3.691 ** | 0.811     | 0       |
| ----- Drought -----     |                     |                              |          |           |           |           |           |         |
| Leaf area               | 60.7                | 12.1 **                      | -0.061   | -0.909 ** | -0.505 *  | -0.590 ** | -0.711 ** | 0       |
| Leaf number             | 60.9                | 1.1                          | 0.013    | -0.058    | 0.014     | 0.016     | -0.043    | 0       |
| Length of primary root  | 70.1                | 4.3 **                       | 0.019    | -2.466 ** | -1.116    | -2.180 ** | -0.364    | 0       |
| Length of lateral roots | 56.8                | 10.1 **                      | 3.176 ** | -2.285 ** | -0.182    | 0.174     | -0.879    | 0       |
| Root system depth       | 46.1                | 15.0 **                      | 0.022    | -0.392 ** | -0.043    | -0.469 ** | -0.325    | 0       |
| Root system width       | 65.9                | 10.8 **                      | 0.147 ** | -0.162 ** | 0.031     | -0.135 ** | -0.146 ** | 0       |
| Total root length       | 75.2                | 6.4 **                       | 3.190    | -4.748 ** | -1.299    | -2.011 ** | -1.236    | 0       |

Table S2. Hundred seed weight of the six barley genotypes.

| Genotype | Weight (g) |
|----------|------------|
| SBCC042  | 6.471      |
| SBCC073  | 7.122      |
| SBCC146  | 5.329      |
| Cierzo   | 5.166      |
| Orria    | 5.181      |
| Scarlett | 4.894      |

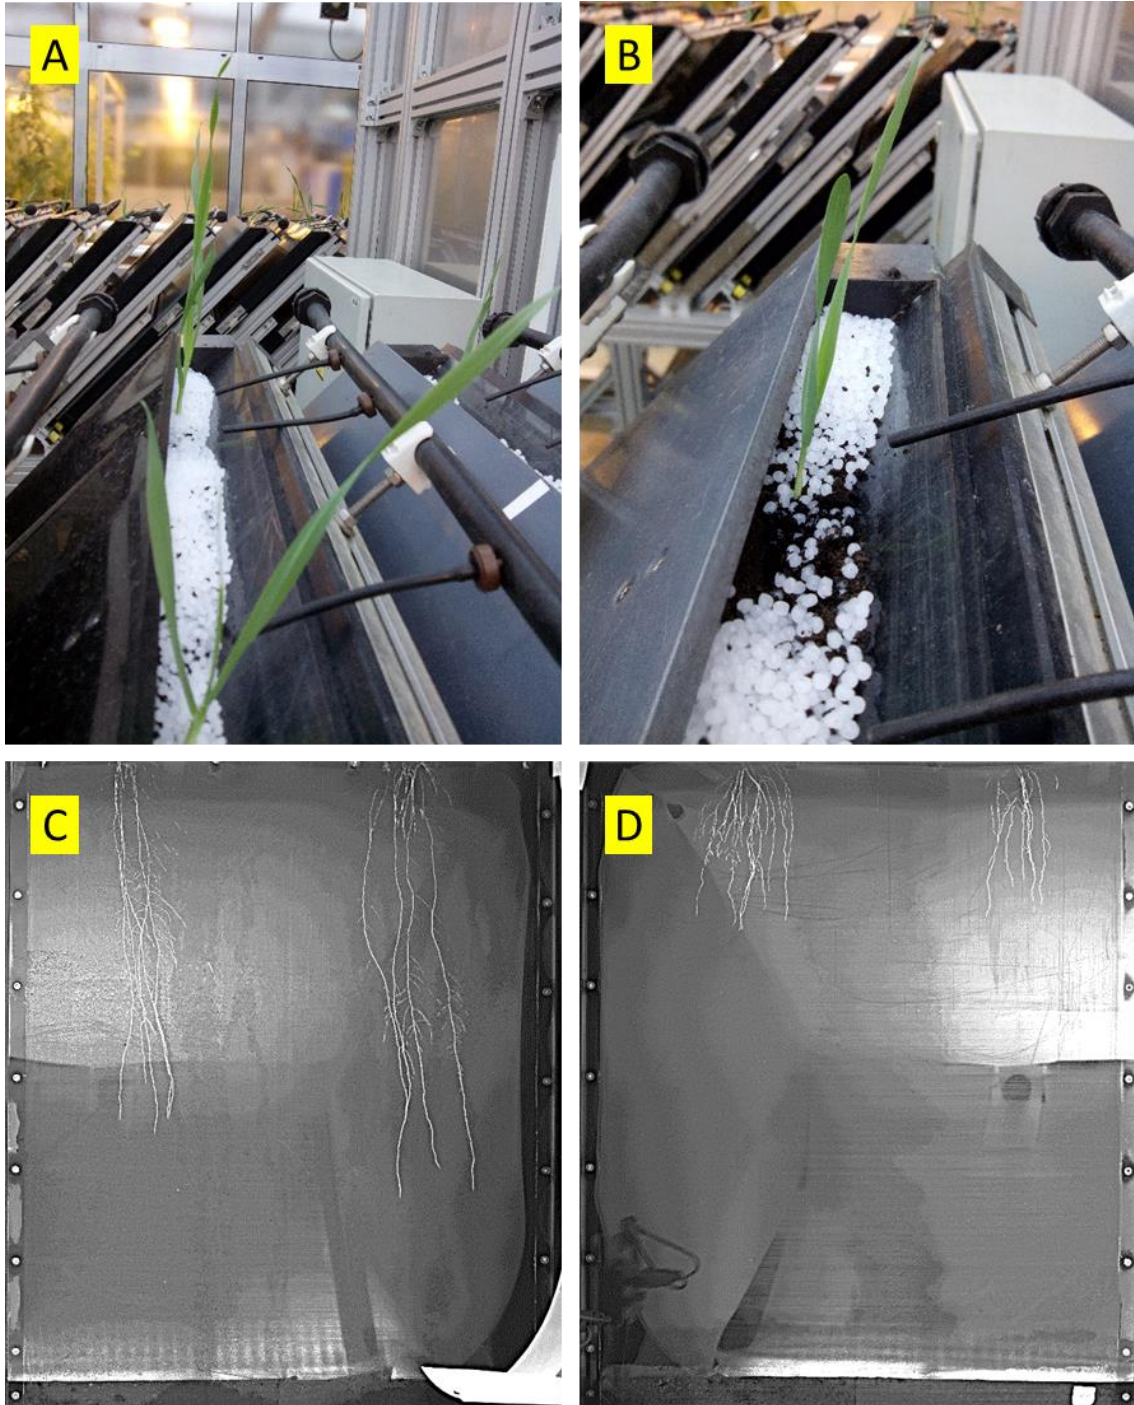

Figure S1. Photographs of plants grown in the experiment. A, B) aerial part of plants grown in the control and drought treatments, respectively. C, D) photographs of rhizoboxes taken in the image analysis cabinet, in the control and drought treatments, respectively.

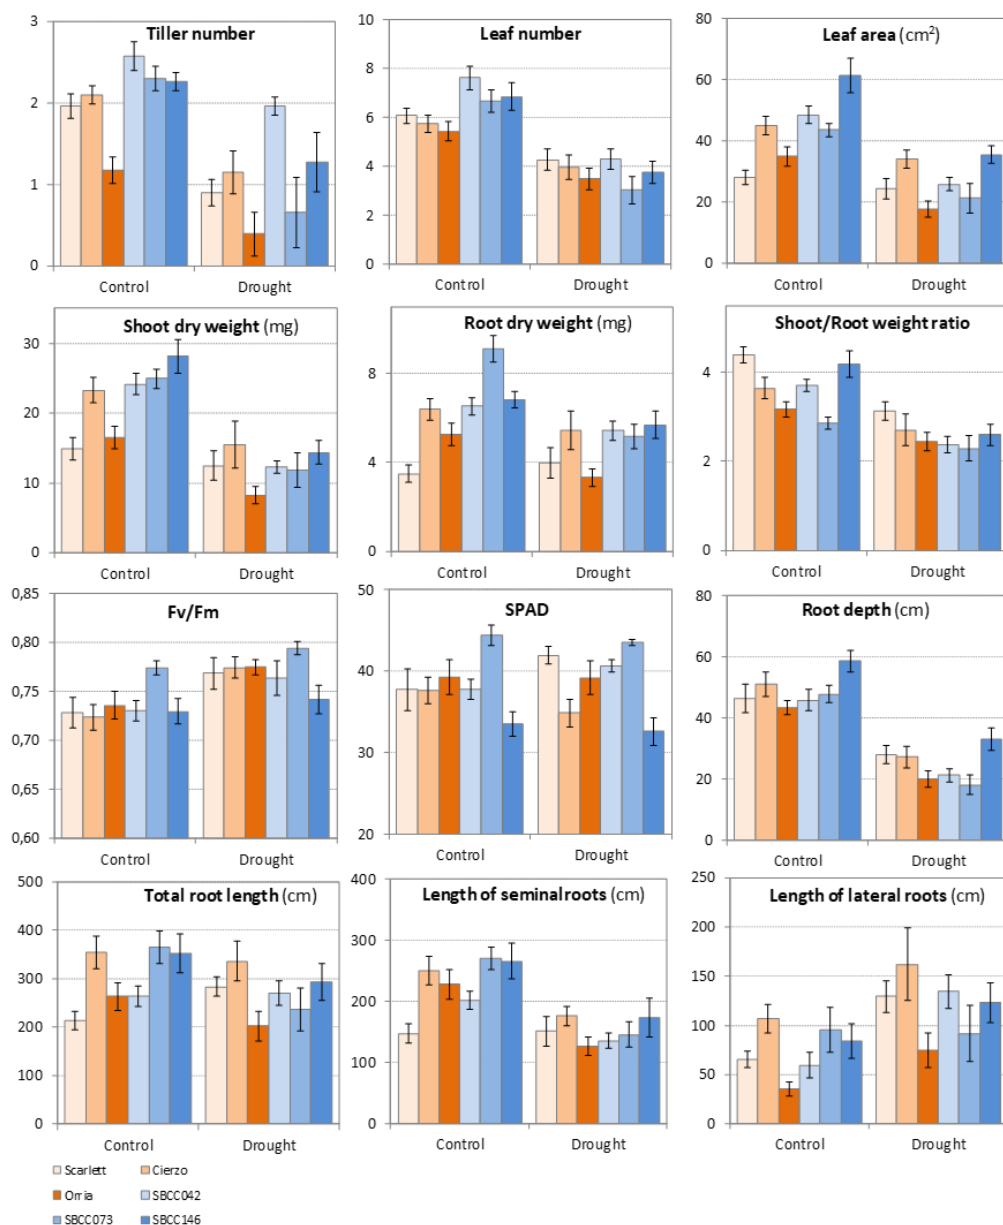

Figure S2. Genotypic averages for all variables measured at the end of the experiment (27 days after sowing) or at specific dates, for SPAD (21 days after sowing) and Fv/Fm (20 days after sowing), at the two treatments, control and drought. Bars represent  $\pm$  standard error of the mean.

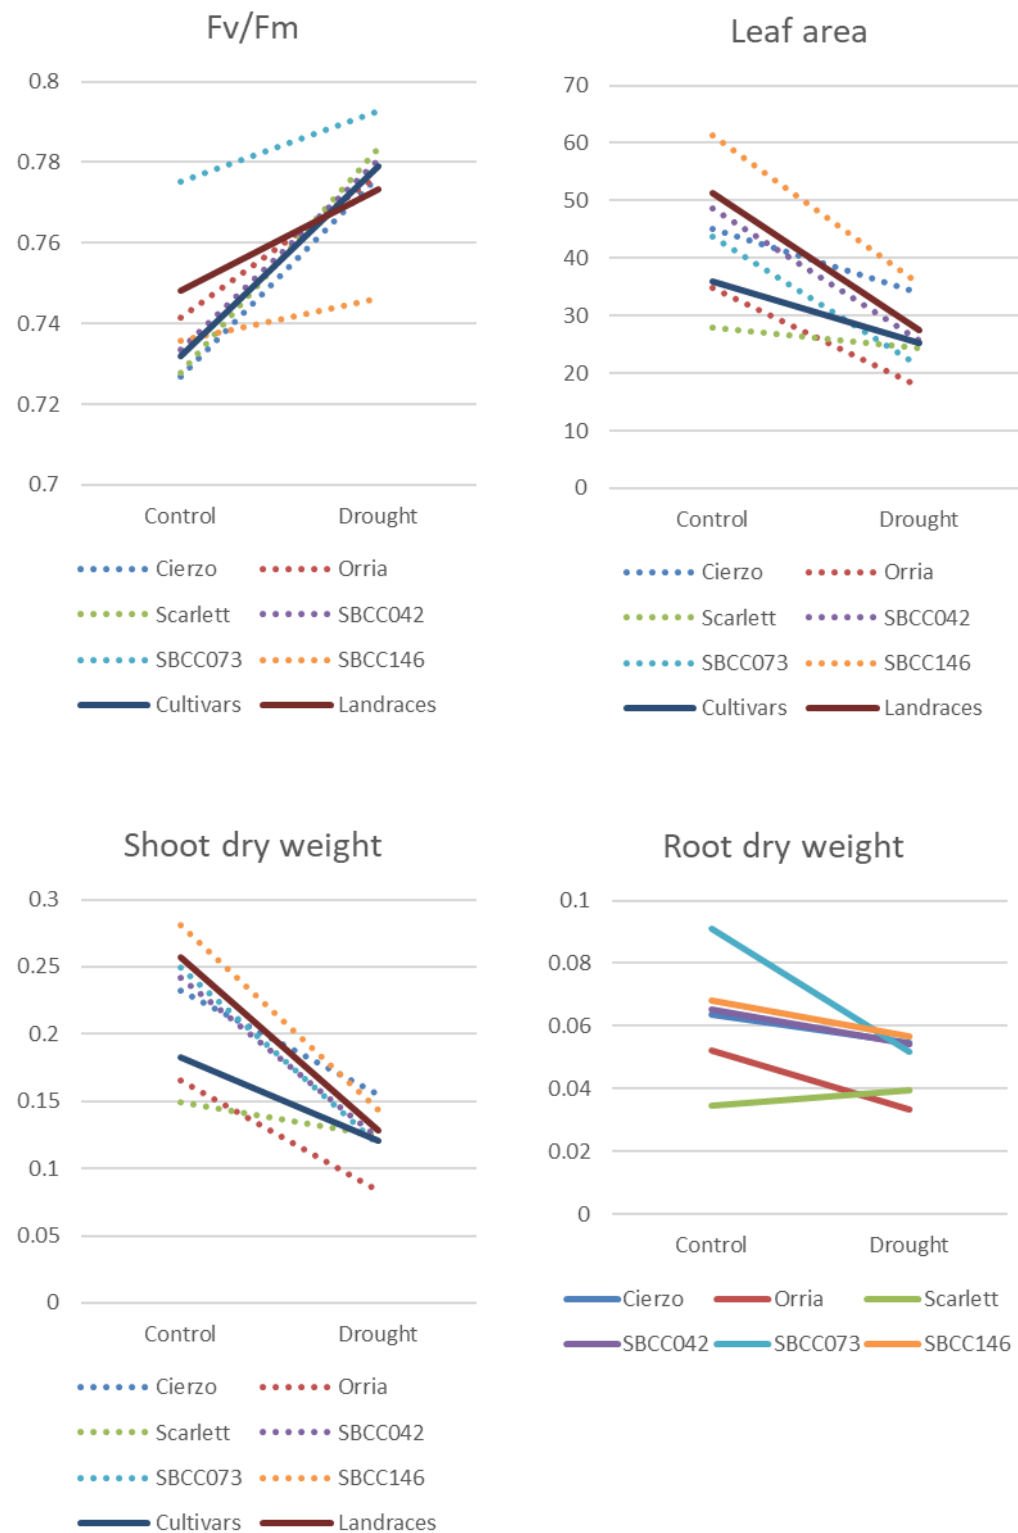

Figure S3. Interaction graphs for selected traits with significant genotype x treatment (all four traits) and type x treatment interaction (Fv/Fm, leaf area and shoot dry weight).
